# Supplementary material for: CEMIP as a potential biomarker and therapeutic target for breast cancer patients
Source: PubMed Central journal article supplement (PMC8964326; doi:10.7150/ijms.58067), 2022-02-07
Supplement: ijmsv19p0434s1.pdf [file ijmsv19p0434s1.pdf]

# Supp Fig 1

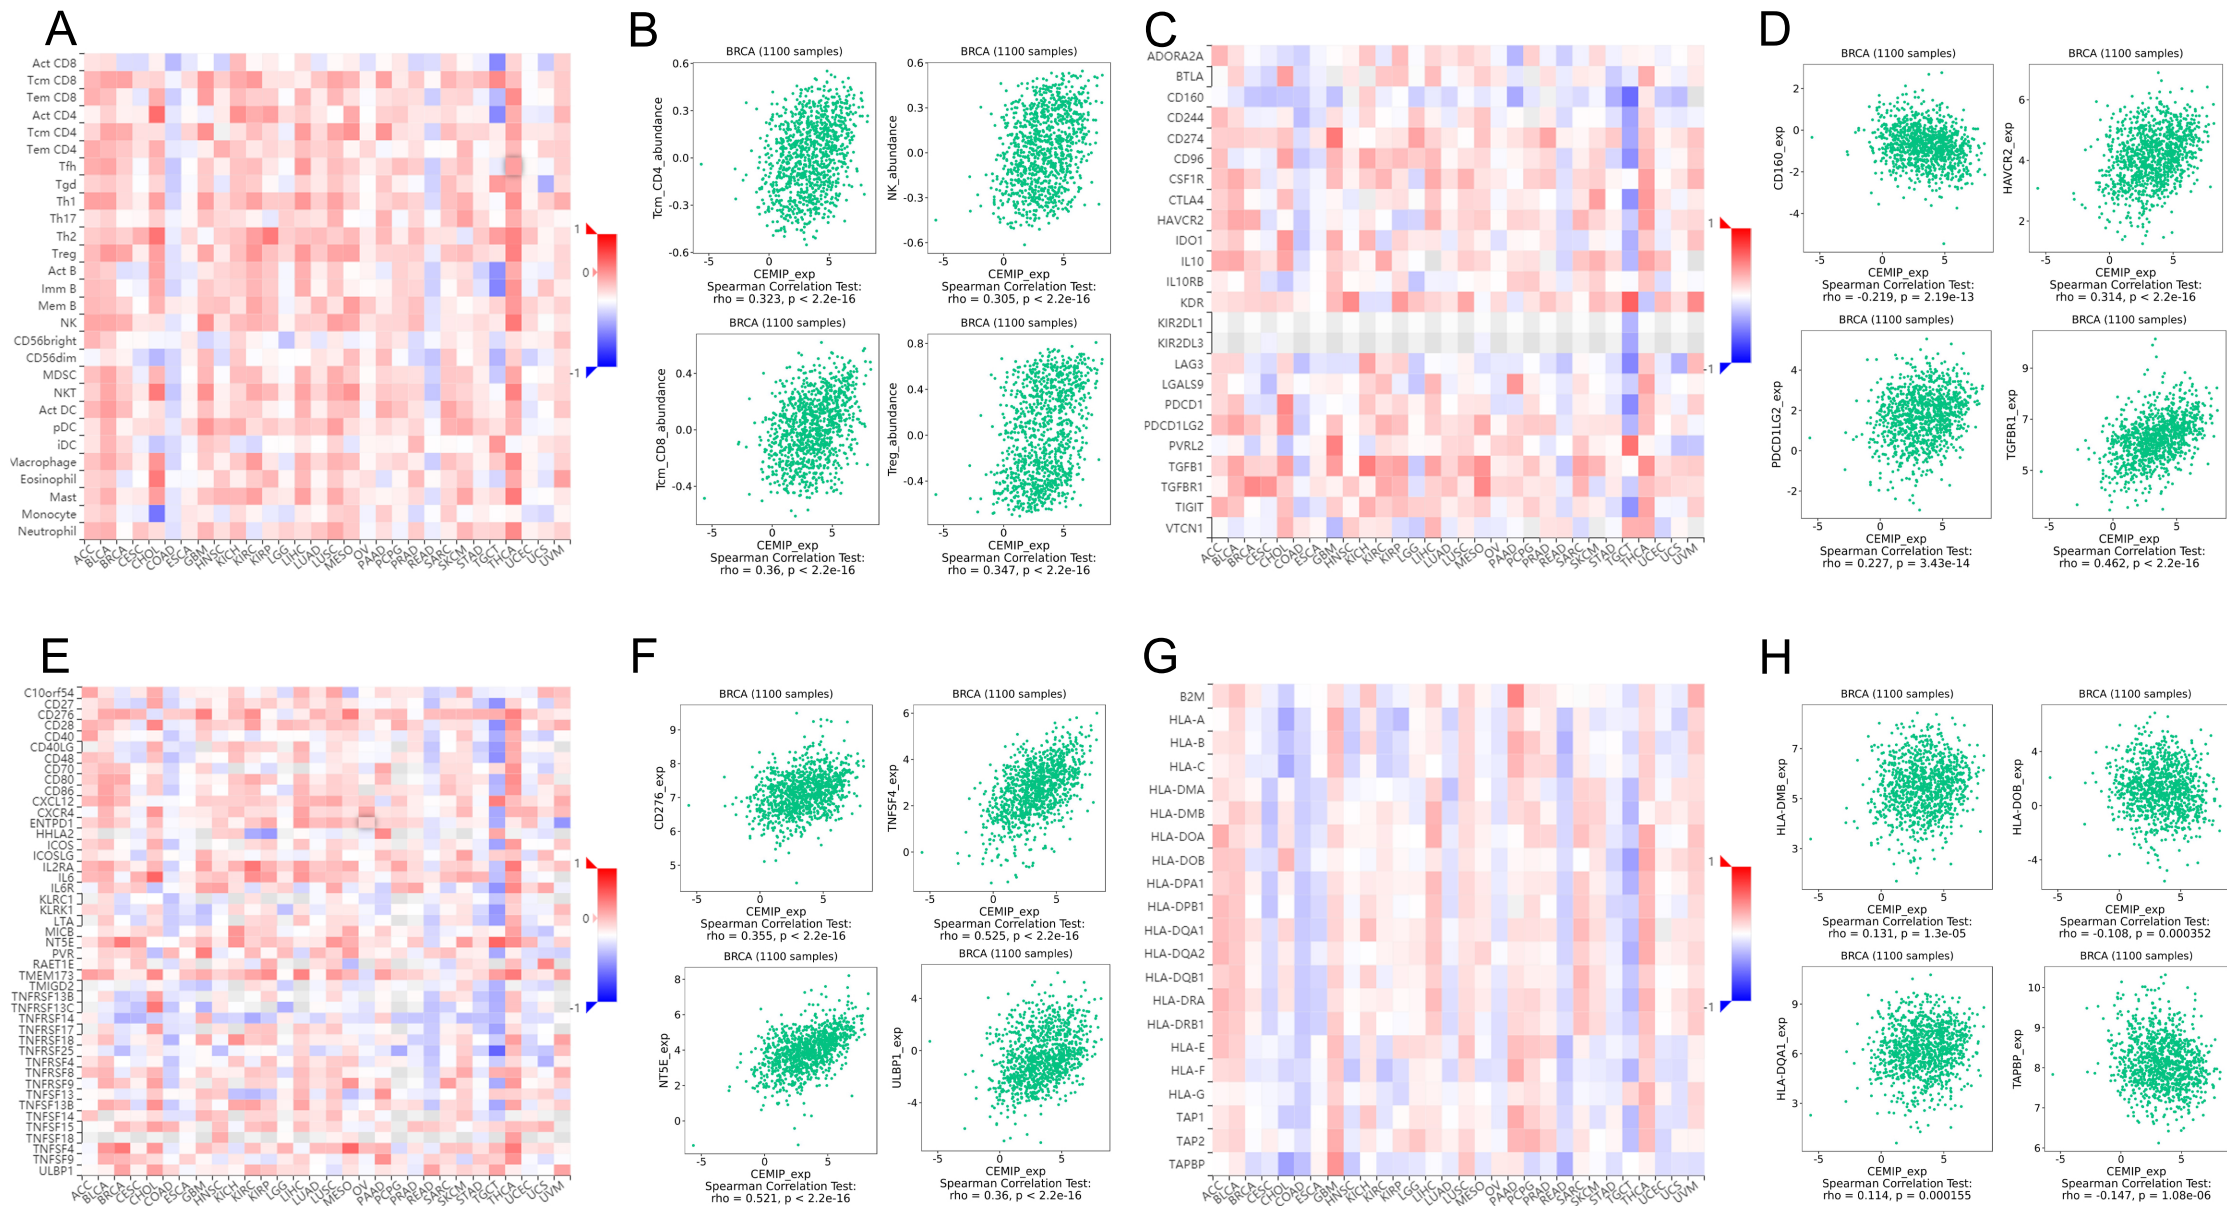

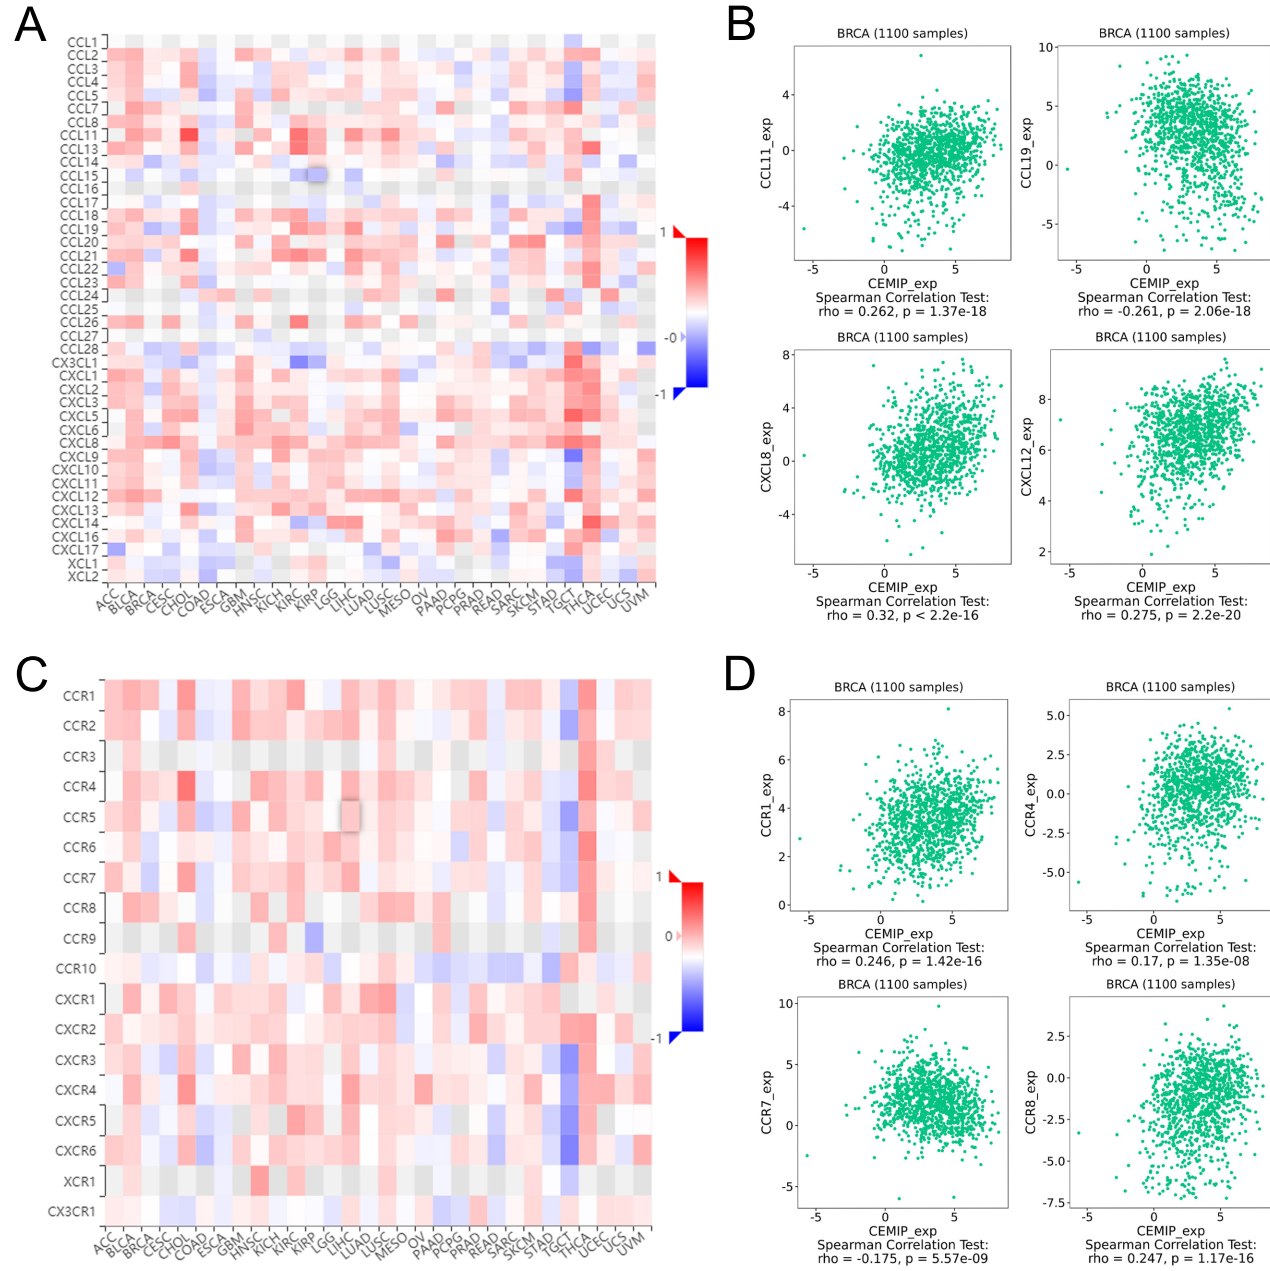

**A** Genes Coexpressed with KIAA1199 in Ginestier Breast  
Grouped by Cancer Type  
(log2 median-centered intensity)

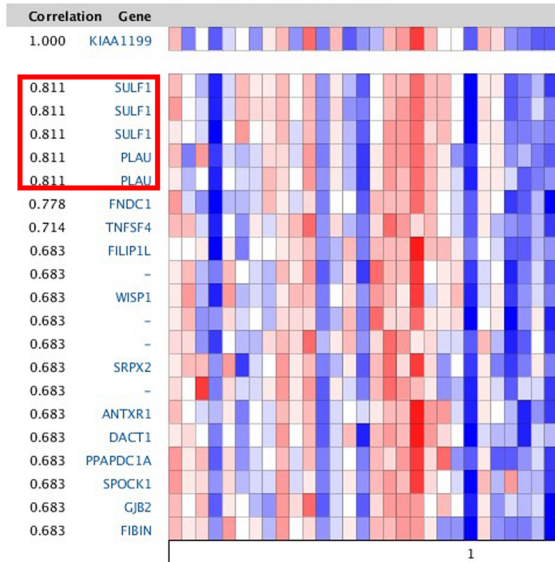

**B** Genes Coexpressed with KIAA1199 in Schmidt Breast  
Grouped by Cancer Type  
(log2 median-centered intensity)

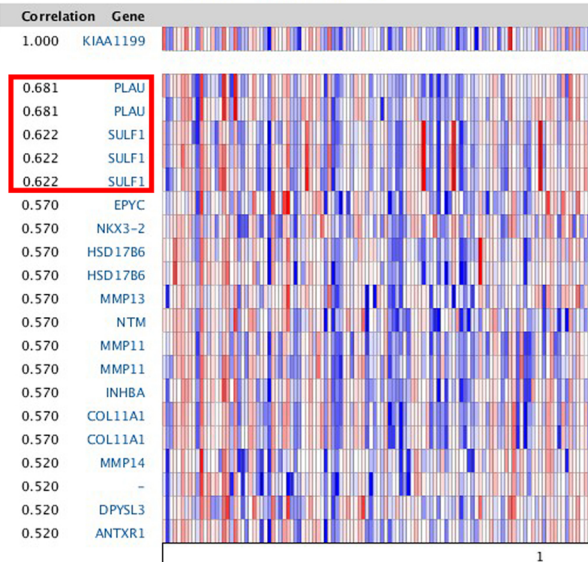

**C**

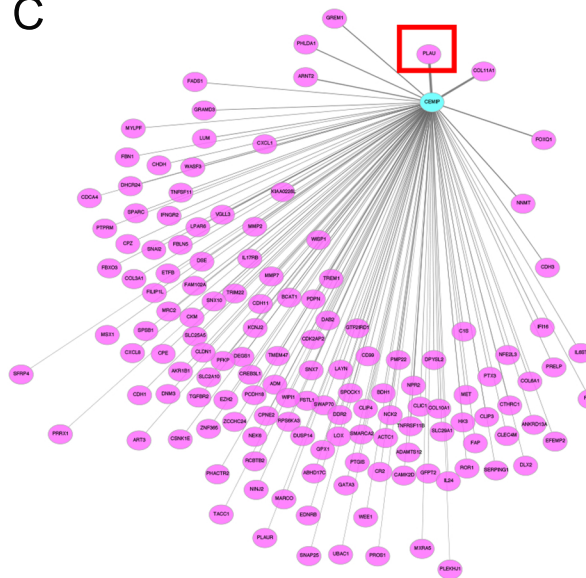

**D**

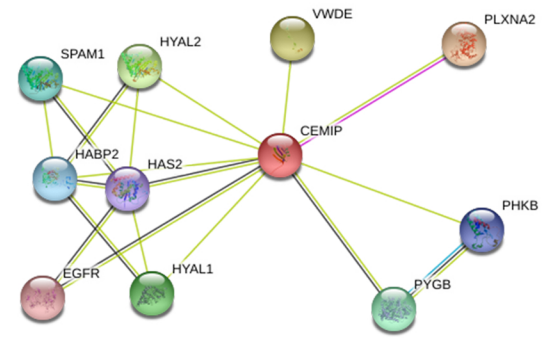

**E**

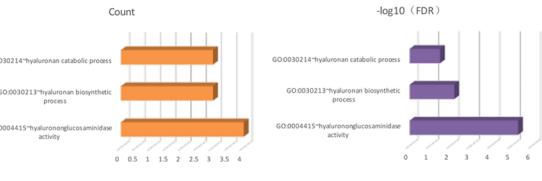

Supp table 1 Univariate and multivariate cox regression analyses of clinicopathological factors for DFS among these breast cancer patients

| Variables         | DFS                 |                 |                       |                 |
|-------------------|---------------------|-----------------|-----------------------|-----------------|
|                   | Univariate analysis |                 | Multivariate analysis |                 |
|                   | HR (95%CI)          | <i>P</i> -value | HR (95%CI)            | <i>P</i> -value |
| Age               | 1.861(1.112-3.112)  | 0.018           | 2.200(1.290-3.753)    | 0.004           |
| T grade           |                     |                 | NS                    |                 |
| 1                 |                     | 0.003           |                       |                 |
| 2                 | 0.763(0.490-1.187)  | 0.230           |                       |                 |
| 3                 | 2.267(1.193-4.307)  | 0.012           |                       |                 |
| N grade           |                     |                 |                       |                 |
| 0                 |                     | <0.001          |                       | <0.001          |
| 1                 | 1.294(0.754-2.219)  | 0.349           | 1.542(0.893-2.664)    | 0.120           |
| 2                 | 3.755(1.912-7.371)  | <0.001          | 3.393(1.722-6.685)    | <0.001          |
| 3                 | 4.492(2.688-7.506)  | <0.001          | 4.244(2.460-7.321)    | <0.001          |
| Menopausal status | 1.414(0.938-2.133)  | 0.098           | NA                    |                 |
| ER status         | 1.362(0.875-2.120)  | 0.172           | NA                    |                 |
| PR status         | 1.326(0.884-1.988)  | 0.173           | NA                    |                 |
| HER2 status       | 1.238(0.801-1.911)  | 0.337           | NA                    |                 |
| Ki67 index        | 1.284(0.853-1.934)  | 0.231           | NA                    |                 |
| CEMIP expression  | 2.751(1.824-4.151)  | <0.001          | 3.062(1.986-4.721)    | <0.001          |

NA: Non-analysis; NS: Non-significant

Supp table 2 Univariate and multivariate cox regression analyses of clinicopathological factors for OS among these breast cancer patients

| Variables         | OS                  |                 |                       |                 |
|-------------------|---------------------|-----------------|-----------------------|-----------------|
|                   | Univariate analysis |                 | Multivariate analysis |                 |
|                   | HR (95%CI)          | <i>P</i> -value | HR (95%CI)            | <i>P</i> -value |
| Age               | 1.199(0.653-2.200)  | 0.558           | NA                    |                 |
| T grade           |                     |                 | NS                    |                 |
| 1                 |                     | 0.036           |                       |                 |
| 2                 | 1.805(0.936-3.481)  | 0.078           |                       |                 |
| 3                 | 3.194(1.303-7.827)  | 0.011           |                       |                 |
| N grade           |                     |                 |                       |                 |
| 0                 |                     | <0.001          |                       | <0.001          |
| 1                 | 1.970(0.979-3.965)  | 0.057           | 2.208(1.088-4.483)    | 0.028           |
| 2                 | 5.439(2.232-13.225) | <0.001          | 4.750(1.879-12.010)   | 0.001           |
| 3                 | 4.881(2.482-9.601)  | <0.001          | 4.162(2.003-8.650)    | <0.001          |
| Menopausal status | 1.301(0.763-2.218)  | 0.334           | NA                    |                 |
| ER status         | 1.227(0.713-2.109)  | 0.460           | NA                    |                 |
| PR status         | 2.110(1.235-3.608)  | 0.006           | NS                    |                 |
| HER2 status       | 2.653(1.531-4.597)  | 0.001           | NS                    |                 |
| Ki67 index        | 3.106(1.781-5.415)  | <0.001          | NS                    |                 |
| CEMIP expression  | 1.899(1.117-3.229)  | 0.018           | 1.823(1.055-3.149)    | 0.031           |

NA: Non-analysis; NS: Non-significant

Supp table 3 The basic clinicopathological characteristics of each cancer patients of Figure 4D

| Characteristics | Patient 1    | Patient 2    | Patient 2    |
|-----------------|--------------|--------------|--------------|
| Age             | 51           | 49           | 56           |
| T stage         | 2            | 2            | 2            |
| N stage         | 1            | 1            | 1            |
| subtype         | Luminal type | Luminal type | Luminal type |

Supp table 4 The relationships between CEMIP expression and the level of tumor-infiltration lymphocytes (TILs).

| The level of TILs | CEMIP expression |          |       | <i>P</i> -value | R value |
|-------------------|------------------|----------|-------|-----------------|---------|
|                   | Negative         | Positive | Total |                 |         |
| Low               | 97               | 47       | 144   | 0.017           | 0.156   |
| High              | 46               | 43       | 89    |                 |         |
| Total             | 143              | 90       | 233   |                 |         |
